# Supplementary material
Source: HighWire-hosted journal article supplement (http://jneurosci.org/highwire/filestream/600048/field_highwire_adjunct_files/1/Supplemental_Legend.pdf)
Supplement: Supplemental_Legend.pdf [file Supplemental_Legend.pdf]

**Figure S1. Suppression of *Dscam* promoter-driven *Dscam* transgenes by *UAS-19RNAi* and *UAS-18/20RNAi***

Composite confocal images of wandering larval MBs show suppression of *Dscam* promoter-driven *Dscam*+19+23::*GFP* (A-C) and -*Dscam*-19+23::*GFP* (D-F) by pan-neuronal induction of *UAS-18/20RNAi* (B and E) and *UAS-19RNAi* (C and F), respectively.
